1  
2 **Short Article Title:** Towards the Target: Tilorone, Quinacrine and Pyronaridine Bind to  
3 Ebola Virus Glycoprotein

4  
5 **Authors:** Thomas R. Lane and Sean Ekins\*

6  
7 **Affiliations:** Collaborations Pharmaceuticals, Inc., 840 Main Campus Drive, Lab 3510,  
8 Raleigh, NC 27606, USA.

9  
10 \*To whom correspondence should be addressed: Sean Ekins, E-mail address:  
11 sean@collaborationspharma.com, Phone: +1 215-687-1320

12  
13 **Short running title:** Ebola glycoprotein inhibitors  
14 **Keywords:** Antiviral, Ebola, glycoprotein

15  
16  
17

# **Abstract**

Pyronaridine, tilorone and quinacrine were recently identified by a machine learning model and demonstrated *in vitro* and *in vivo* activity against Ebola virus (EBOV) and represent viable candidates for drug repurposing. These drugs were docked into the crystal structure of the ebola glycoprotein and then experimentally validated *in vitro* to generate Kd values for tilorone (0.73  $\mu$ M) pyronaridine (7.34  $\mu$ M), and quinacrine (7.55  $\mu$ M). These are more potent than the previously reported toremifene (16  $\mu$ M).

The ongoing Ebola virus (EBOV) outbreak in the Democratic Republic of the Congo, has killed over 2200 people at the time of writing according to the World Health Organization (1). While there is an approved vaccine for prevention of EBOV disease (2) we have no approved antivirals to treat patients although there are several

41 treatments that have reached the clinic (3-6) with the most promising results for  
 42 biologics only. One target of particular interest for antibody therapies (7) is the  
 43 glycoprotein which is composed of GP1 and GP2 subunits and is involved in attachment  
 44 to the cell and entry (8). Earlier high throughput screens had identified benzodiazepine  
 45 analogs as GP1 inhibitors which act early in viral entry (8, 9). Several structurally  
 46 diverse FDA approved drugs have also been identified including toremifene,  
 47 benztropine, bepridil, paroxetine, sertraline and ibuprofen (10) which all bind in the  
 48 same site at the tunnel entrance to the glycoprotein, destabilizing it and resulting in  
 49 release of GP2, thus preventing fusion between virus and endosome (9). Several other  
 50 research groups have identified small molecules that inhibit glycoprotein, suggesting a  
 51 wide array of molecules may bind (11-15). Others have used computational approaches  
 52 to perform virtual screens to identify inhibitors of GP2 (16). Recent efforts to identify  
 53 small molecules drugs for EBOV have included using computational methods in the  
 54 form of a Bayesian machine learning (ML) approach trained with EBOV inhibitors (17,  
 55 18). This ML model enabled a virtual screen and selection of three compounds, tilorone,  
 56 quinacrine and pyronaridine tetraphosphate (19). All these drugs inhibited EBOV *in vitro*  
 57 and *in vivo* in the mouse-adapted EBOV (ma-EBOV) efficacy model (20-23).  
 58 Pyronaridine tetraphosphate also demonstrated significant activity in the guinea pig  
 59 adapted model of EBOV infection (24) and is currently used as an antimalarial in  
 60 combination with artesunate (Pyramax®). Most recently pyronaridine was shown to be a  
 61 potent lysosomotropic agent while artesunate which is also active against EBOV *in vitro*  
 62 was not (25). Combining these two drugs had an additive effect on inhibiting EBOV  
 63 replication *in vitro* and reduced cytotoxicity (25). Pursuit of the potential target of these

computationally identified drugs pointed to docking compounds in the glycoprotein structure and experimental validation.

# **Pyronaridine, tilorone and quinacrine are predicted to bind to EBOV glycoprotein.**

Our three EBOV inhibitors: tilorone, pyronaridine and quinacrine were docked into the EBOV glycoprotein structure (PDB 5JQ7) at the same site as previously described for toremifene (10) using Discovery Studio LibDock. Binding energies were calculated following a ligand minimization (rigid protein). As a control, toremifene had a calculated minimized binding energy of -114.772 kcal/mol. Pyronaridine had the best score -277.63 kcal/mol, followed by tilorone (-171.73 kcal/mol) and quinacrine (-164.07 kcal/mol) (Fig 1).

# **Pyronaridine, tilorone and quinacrine bind to EBOV glycoprotein *in vitro*.**

Pyronaridine tetraphosphate [4-[(7-Chloro-2-methoxybenzo[b][1,5]naphthyridin-10-yl)amino]-2,6-bis(1-pyrrolidinylmethyl)phenol phosphate (1:4)] (19) was purchased from BOC Sciences (Shirley NY). Tilorone and quinacrine were purchased from Cayman Chemicals (Ann Arbor, Michigan). Toremifene and clomiphene were purchased from MedChemExpress (Monmouth Junction, NJ) and favipirivir from TRC Canada (North York, ON Canada). Zaire ebolavirus disulfide-linked glycoprotein heterodimer (GP1-GP2) was purchased from Novus biologicals (Centennial, CO). According to the manufacturer, EBOV GP protein is purified from CHO-derived viral expression with previous internal verification of significant glycosylation. 200 µg of lyophilized protein was resuspended in RED-NHS 2nd Generation labeling buffer (NanoTemper;

Cambridge, MA). This was followed by the labeling of the primary amines using the RED-NHS dye according to the manufacturers protocol. Labeled protein was buffer exchanged into 10 mM MES, pH 5.0, 150 mM NaCl, 170 mM sodium malonate at pH 5.2 (MST buffer), which is similar to a buffer previously shown to be appropriate for EBOV GP (10), and then diluted to a final concentration of 1  $\mu$ M. For each experimental compound 16 independent stocks were made in DMSO using 2-fold serial dilution (10 mM initial concentration). The MST buffer used for a final dilution prior to MST was supplemented with 0.05% Tween 20 and 10 mM BME. The protein was diluted to 2.5 nM in the supplemented MST buffer and 19.5  $\mu$ L of this was combined with 0.5  $\mu$ L of the compound stock and then mixed thoroughly. This resulted in 2-fold serial dilution testing series with the highest and lowest concentration of 250  $\mu$ M and 7.629 nM, respectively, with a consistent final DMSO concentration of 2.5%. These reactions were incubated for 20-30 min prior to transferring to standard Monolith NT.115 capillaries. Experiments were run at 20% excitation and high MST power at 23.0°C on a Monolith NT.115Pico (NanoTemper). Favipiravir and toremifene were also run as the negative and positive controls, respectively. Each experimental compound was run in quadruplicate.

# **Data acquisition and analysis**

The data were acquired with MO.Control 1.6.1 (NanoTemper Technologies). Recorded data were analyzed with MO.Affinity Analysis 2.3 (NanoTemper Technologies). The dissociation constant  $K_d$  quantifies the equilibrium of the reaction of the labelled

molecule A (concentration  $c_A$ ) with its target T (concentration  $c_T$ ) to form the complex AT (concentration  $c_{AT}$ ): and is defined by the law of mass action as:  $K_d = \frac{c_A \times c_T}{c_{AT}}$ , where all concentrations are “free” concentrations. During the titration experiments the concentration of the labelled molecule A is kept constant and the concentration of added target T is increased. These concentrations are known and can be used to calculate the dissociation constant. The free concentration of the labelled molecule A is the added concentration minus the concentration of formed complex AT. The  $K_d$  is calculated as  $K_d = \frac{(c_A^0 - c_{AT}) \times (c_T^0 - c_{AT})}{c_{AT}}$ . The fraction of bound molecules  $x$  can be derived from  $F_{\text{norm}}$ , where  $F_{\text{norm}}(A)$  is the normalized fluorescence of only unbound labelled molecules A and  $F_{\text{norm}}(AT)$  is the normalized fluorescence of complexes AT of labeled as shown by the equation:  $x = \frac{F_{\text{norm}}(c_T^0) - F_{\text{norm}}(A)}{F_{\text{norm}}(AT) - F_{\text{norm}}(A)}$ . The MST traces that showed aggregation or outliers were removed from the datasets prior to  $K_d$  determination.

The  $K_d$  values for pyronaridine (7.34  $\mu\text{M}$ ), tilorone (0.73  $\mu\text{M}$ ) and quinacrine (7.55  $\mu\text{M}$ ) were lower than for the positive control toremifene (24.83  $\mu\text{M}$ ) which is very similar to the literature value of 16  $\mu\text{M}$  run under similar conditions (10). Additionally, we identified clomiphene (30.74  $\mu\text{M}$ ), whereas favipiravir and artesunate did not bind to the EBOV glycoprotein (Figure 2). Favipiravir is an RNA polymerase inhibitor and would not be expected to bind to the glycoprotein. We have previously demonstrated that artesunate does not inhibit lysotracker (25) and is likely inhibiting ebola via a different mechanism to pyronaridine with which it is used in combination as the drug Pyramax<sup>TM</sup> for malaria. The lack of inhibition of glycoprotein by artesunate provides further confirmation of this.

131 Prior work on pyronaridine has demonstrated that it has promising *in vitro* activity  
132 against EBOV as well as excellent *in vitro* absorption, distribution, metabolism and  
133 excretion (ADME) properties and a very long half-life across mice and humans (21). It  
134 also has statistically significant *in vivo* efficacy in mice and guinea pigs infected with  
135 EBOV (24). While the mechanism to date was unclear, it has been shown to inhibit  
136 lysostracker suggesting a lysosomotropic effect (25). When this is coupled with the  
137 potential to bind to glycoprotein this dual mechanism will likely prevent EBOV entry.  
138 Similarly, quinacrine, is a small-molecule, orally bioavailable drug which has also been  
139 used clinically as an antimalarial. This also has very favorable ADME properties (apart  
140 from potent CYP2D6 inhibition) and demonstrated *in vivo* activity in mice infected with  
141 EBOV (20). Tilorone is structurally different and is used in eastern Europe as an  
142 antiviral. It has excellent *in vitro* ADME properties and was recently demonstrated to  
143 have potent *in vitro* inhibition of EBOV as well as efficacy in mouse infected with EBOV  
144 (22). Interestingly this molecule did not demonstrate efficacy in the guinea pig EBOV  
145 model likely due to the significant species differences in metabolism when compared to  
146 mouse (24). Tilorone has also demonstrated *in vitro* inhibition of MERS (26) and is  
147 under evaluation as a potential treatment for other coronaviruses such as SARS-CoV-2  
148 (23) and has shown a low  $\mu\text{M}$   $\text{IC}_{50}$  (27). This current work now provides further detail as  
149 to how these molecules target EBOV glycoprotein as well as being lysosomotropic,  
150 enabling their blocking of viral entry. This information may aid in structure guided  
151 modification of these compounds and future X-ray crystallography. Such mechanistic  
152 insights may aid drug discovery for other viruses (e.g. SARS-CoV-2). To date tilorone

would appear the highest affinity compound for EBOV glycoprotein compared to the previously reported toremifene (10, 15).

In conclusion, the accumulated *in vitro* and *in vivo* data gathered for tilorone, quinacrine and pyronaridine points to them sharing a common target or mechanism for the inhibition of EBOV (20-22, 24, 25, 28). It would also appear they all block entry, are lysosomotropic and now are identified to bind to the glycoprotein. Shedding further light on how these molecules work *in vitro* may provide further justification for clinically repurposing these compounds.

## ACKNOWLEDGMENTS

We would like to sincerely thank Dr Peter Madrid, Dr. Jason Comer, Dr. Julie Dyall, Dr. Manu Anantpadma, and Dr. Robert Davey for many Ebola related discussions. Dr. Ana Puhl is gratefully acknowledged for discussions on MST.

## FUNDING

We kindly acknowledge NIH funding: R21TR001718 from NCATS as well as 1R43GM122196-01 and R44GM122196-02A1 “Centralized assay datasets for modelling support of small drug discovery organizations” from NIGMS.

## CONFLICTS OF INTEREST

SE is CEO of Collaborations Pharmaceuticals, Inc. TRL is an employee at Collaborations Pharmaceuticals, Inc. Collaborations Pharmaceuticals, Inc. has



obtained FDA orphan drug designations for pyronaridine, tilorone and quinacrine for use against Ebola.

## REFERENCES

1. Ilunga Kalenga O, Moeti M, Sparrow A, Nguyen VK, Lucey D, Ghebreyesus TA. 2019. The Ongoing Ebola Epidemic in the Democratic Republic of Congo, 2018-2019. N Engl J Med doi:10.1056/NEJMSr1904253.
2. FDA. 2019. First FDA-approved vaccine for the prevention of Ebola virus disease, marking a critical milestone in public health preparedness and response. <https://www.fda.gov/news-events/press-announcements/first-fda-approved-vaccine-prevention-ebola-virus-disease-marking-critical-milestone-public-health>. Accessed 5 April.
3. Qiu X, Wong G, Audet J, Bello A, Fernando L, Alimonti JB, Fausther-Bovendo H, Wei H, Aviles J, Hiatt E, Johnson A, Morton J, Swope K, Bohorov O, Bohorova N, Goodman C, Kim D, Pauly MH, Velasco J, Pettitt J, Olinger GG, Whaley K, Xu B, Strong JE, Zeitlin L, Kobinger GP. 2014. Reversion of advanced Ebola virus disease in nonhuman primates with ZMapp. Nature 514:47-53.
4. Corti D, Misasi J, Mulangu S, Stanley DA, Kanekiyo M, Wollen S, Ploquin A, Doria-Rose NA, Staupe RP, Bailey M, Shi W, Choe M, Marcus H, Thompson EA, Cagigi A, Silacci C, Fernandez-Rodriguez B, Perez L, Sallusto F, Vanzetta F, Agatic G, Cameroni E, Kisalu N, Gordon I, Ledgerwood JE, Mascola JR, Graham

BS, Muyembe-Tamfun JJ, Trefry JC, Lanzavecchia A, Sullivan NJ. 2016.

Protective monotherapy against lethal Ebola virus infection by a potentially neutralizing antibody. *Science* 351:1339-42.

5. Sivapalasingam S, Kamal M, Slim R, Hosain R, Shao W, Stoltz R, Yen J, Pologe LG, Cao Y, Partridge M, Sumner G, Lipsich L. 2018. Safety, pharmacokinetics, and immunogenicity of a co-formulated cocktail of three human monoclonal antibodies targeting Ebola virus glycoprotein in healthy adults: a randomised, first-in-human phase 1 study. *Lancet Infect Dis* 18:884-893.

6. Mulangu S, Dodd LE, Davey RT, Jr., Tshiani Mbaya O, Proshan M, Mukadi D, Lusakibanza Manzo M, Nzolo D, Tshomba Oloma A, Ibanda A, Ali R, Coulibaly S, Levine AC, Grais R, Diaz J, Lane HC, Muyembe-Tamfun JJ, Group PW, Sivahera B, Camara M, Kojan R, Walker R, Dighero-Kemp B, Cao H, Mukumbayi P, Mbala-Kingebeni P, Ahuka S, Albert S, Bonnett T, Crozier I, Duvenhage M, Proffitt C, Teitelbaum M, Moench T, Aboulhab J, Barrett K, Cahill K, Cone K, Eckes R, Hensley L, Herpin B, Higgs E, Ledgerwood J, Pierson J, Smolskis M, Sow Y, Tierney J, Sivapalasingam S, Holman W, Gettinger N, Vallee D, Nordwall J, Team PCS. 2019. A Randomized, Controlled Trial of Ebola Virus Disease Therapeutics. *N Engl J Med* 381:2293-2303.

7. Saphire EO, Schendel SL, Fusco ML, Gangavarapu K, Gunn BM, Wec AZ, Halfmann PJ, Brannan JM, Herbert AS, Qiu X, Wagh K, He S, Giorgi EE, Theiler J, Pommert KBJ, Krause TB, Turner HL, Murin CD, Pallesen J, Davidson E, Ahmed R, Aman MJ, Bukreyev A, Burton DR, Crowe JE, Jr., Davis CW,

221 Georgiou G, Krammer F, Kyratsous CA, Lai JR, Nykiforuk C, Pauly MH, Rijal P,  
 222 Takada A, Townsend AR, Volchkov V, Walker LM, Wang CI, Zeitlin L, Doranz  
 223 BJ, Ward AB, Korber B, Kobinger GP, Andersen KG, Kawaoka Y, Alter G,  
 224 Chandran K, Dye JM, Viral Hemorrhagic Fever Immunotherapeutic C. 2018.  
 225 Systematic Analysis of Monoclonal Antibodies against Ebola Virus GP Defines  
 226 Features that Contribute to Protection. Cell 174:938-952 e13.

227 8. Basu A, Li B, Mills DM, Panchal RG, Cardinale SC, Butler MM, Peet NP, Majgier-  
 228 Baranowska H, Williams JD, Patel I, Moir DT, Bavari S, Ray R, Farzan MR, Rong  
 229 L, Bowlin TL. 2011. Identification of a small-molecule entry inhibitor for  
 230 filoviruses. J Virol 85:3106-19.

231 9. Ren J, Zhao Y, Fry EE, Stuart DI. 2018. Target Identification and Mode of Action  
 232 of Four Chemically Divergent Drugs against Ebolavirus Infection. J Med Chem  
 233 61:724-733.

234 10. Zhao Y, Ren J, Harlos K, Jones DM, Zeltina A, Bowden TA, Padilla-Parra S, Fry  
 235 EE, Stuart DI. 2016. Toremifene interacts with and destabilizes the Ebola virus  
 236 glycoprotein. Nature 535:169-172.

237 11. Cui Q, Cheng H, Xiong R, Zhang G, Du R, Anantpadma M, Davey RA, Rong L.  
 238 2018. Identification of Diaryl-Quinoline Compounds as Entry Inhibitors of Ebola  
 239 Virus. Viruses 10.

- 240 12. Li Q, Ma L, Yi D, Wang H, Wang J, Zhang Y, Guo Y, Li X, Zhou J, Shi Y, Gao  
241 GF, Cen S. 2018. Novel cyclo-peptides inhibit Ebola pseudotyped virus entry by  
242 targeting primed GP protein. *Antiviral Res* 155:1-11.
- 243 13. Shaikh F, Zhao Y, Alvarez L, Iliopoulou M, Lohans C, Schofield CJ, Padilla-Parra  
244 S, Siu SWI, Fry EE, Ren J, Stuart DI. 2019. Structure-Based in Silico Screening  
245 Identifies a Potent Ebolavirus Inhibitor from a Traditional Chinese Medicine  
246 Library. *J Med Chem* 62:2928-2937.
- 247 14. Yermolina MV, Wang J, Caffrey M, Rong LL, Wardrop DJ. 2011. Discovery,  
248 synthesis, and biological evaluation of a novel group of selective inhibitors of  
249 filoviral entry. *J Med Chem* 54:765-81.
- 250 15. Zhao Y, Ren J, Fry EE, Xiao J, Townsend AR, Stuart DI. 2018. Structures of  
251 Ebola Virus Glycoprotein Complexes with Tricyclic Antidepressant and  
252 Antipsychotic Drugs. *J Med Chem* 61:4938-4945.
- 253 16. Singleton CD, Humby MS, Yi HA, Rizzo RC, Jacobs A. 2019. Identification of  
254 Ebola Virus Inhibitors Targeting GP2 Using Principles of Molecular Mimicry. *J*  
255 *Virol* 93.
- 256 17. Madrid PB, Chopra S, Manger ID, Gilfillan L, Keepers TR, Shurtleff AC, Green  
257 CE, Iyer LV, Dilks HH, Davey RA, Kolokoltssov AA, Carrion R, Jr., Patterson JL,  
258 Bavari S, Panchal RG, Warren TK, Wells JB, Moos WH, Burke RL, Tanga MJ.  
259 2013. A systematic screen of FDA-approved drugs for inhibitors of biological  
260 threat agents. *PLoS One* 8:e60579.

- 261 18. Madrid PB, Panchal RG, Warren TK, Shurtleff AC, Endsley AN, Green CE,  
262 Kolokoltsov AA, Davey RA, Manger ID, Gilfillan L, Bavari S, Tanga MJ. 2015.  
263 Evaluation of Ebola Virus Inhibitors for Drug Repurposing. ACS Inf Dis 1:317-  
264 326.
- 265 19. Ekins S, Freundlich J, Clark A, Anantpadma M, Davey R, Madrid P. 2015.  
266 Machine learning models identify molecules active against Ebola virus in vitro.  
267 F1000Res 4:1091.
- 268 20. Lane TR, Comer JE, Freiberg AN, Madrid PB, Ekins S. 2019. Repurposing  
269 Quinacrine Against Ebola Virus Infection In vivo. Antimicrob Agents Chemother  
270 63:e01142-19.
- 271 21. Lane TR, Massey C, Comer JE, Anantpadma M, Freundlich JS, Davey RA,  
272 Madrid PB, Ekins S. 2019. Repurposing The Antimalarial Pyronaridine  
273 Tetraphosphate To Protect Against Ebola Virus Infection PLoS Negl Trop Dis  
274 13:e0007890.
- 275 22. Ekins S, Lingerfelt MA, Comer JE, Freiberg AN, Mirsalis JC, O'Loughlin K,  
276 Harutyunyan A, McFarlane C, Green CE, Madrid PB. 2018. Efficacy of Tilorone  
277 Dihydrochloride against Ebola Virus Infection. Antimicrob Agents Chemother  
278 62:e01711-17.
- 279 23. Ekins S, Lane TR, Madrid PB. 2020. Tilorone: a Broad-Spectrum Antiviral  
280 Invented in the USA and Commercialized in Russia and beyond. Pharm Res  
281 37:71.

24. Lane TR, Massey C, Comer JE, Freiberg AN, Zhou H, Dyll J, Holbrook MR, Anantpadma M, Davey RA, Madrid PB, Ekins S. 2020. Pyronaridine Tetraphosphate Efficacy Against Ebola Virus Infection in Guinea Pig. bioRxiv doi:10.1101/2020.03.20.001081:2020.03.20.001081.
25. Lane TR, Dyll J, Mercer L, Goodin C, Foil DH, Zhou H, Postnikova E, Liang JY, Holbrook MR, Madrid PB, Ekins S. 2020. Repurposing Pyramax® for the Treatment of Ebola Virus Disease: Additivity of the Lysosomotropic Pyronaridine and Non-Lysosomotropic Artesunate <https://www.biorxiv.org/content/10.1101/2020.04.25.061333v1>. Accessed
26. Ekins S, Madrid PB. 2020. Tilorone: A Broad-Spectrum Antiviral For Emerging Viruses. Antimicrob Agents Chemother 64:e00440-20.
27. Jeon S, Ko M, Lee J, Choi I, Byun SY, Park S, Shum D, Kim S. 2020. Identification of antiviral drug candidates against SARS-CoV-2 from FDA-approved drugs. Antimicrob Agents Chemother In press.
28. Anantpadma M, Lane T, Zorn KM, Lingerfelt MA, Clark AM, Freundlich JS, Davey RA, Madrid P, Ekins S. 2019. Ebola Virus Bayesian Machine Learning Models Enable New In Vitro Leads ACS Omega 4:2353-2361.

Figure 1. Docking of ligands in EBOV glycoprotein crystal structure showing lowest energy poses from the rigid docking (libdock). Cartoon representations of EBOV glycoprotein (GP1(Cyan)-GP2(Red)) with a glycan cap (purple). A) Crystal structure of EBOV GP in complex with toremifene (PDB ID: 5JQ7; 2.69 Å) As a control, toremifene had a calculated minimized binding energy of -114.772 kcal/mol. Top scoring docked poses of pyronaridine (B, -277.63 kcal/mol), tilorone (C, -171.73 kcal/mol) and quinacrine (D, -164.07 kcal/mol) in EBOV GP using libdock. Binding energies were calculated following a ligand minimization (rigid protein).

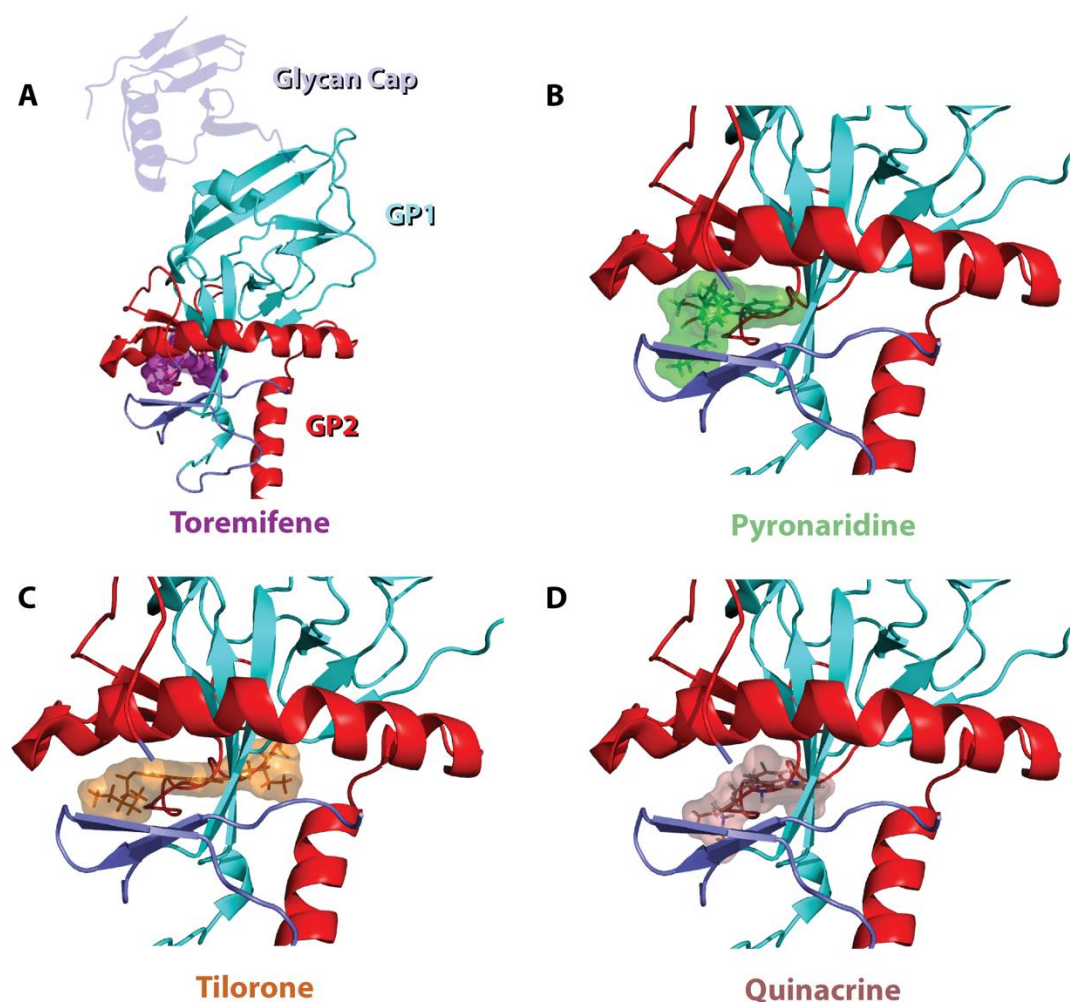

Figure 2. Ebola glycoprotein K<sub>d</sub> values generated using microscale thermophoresis for test compounds.

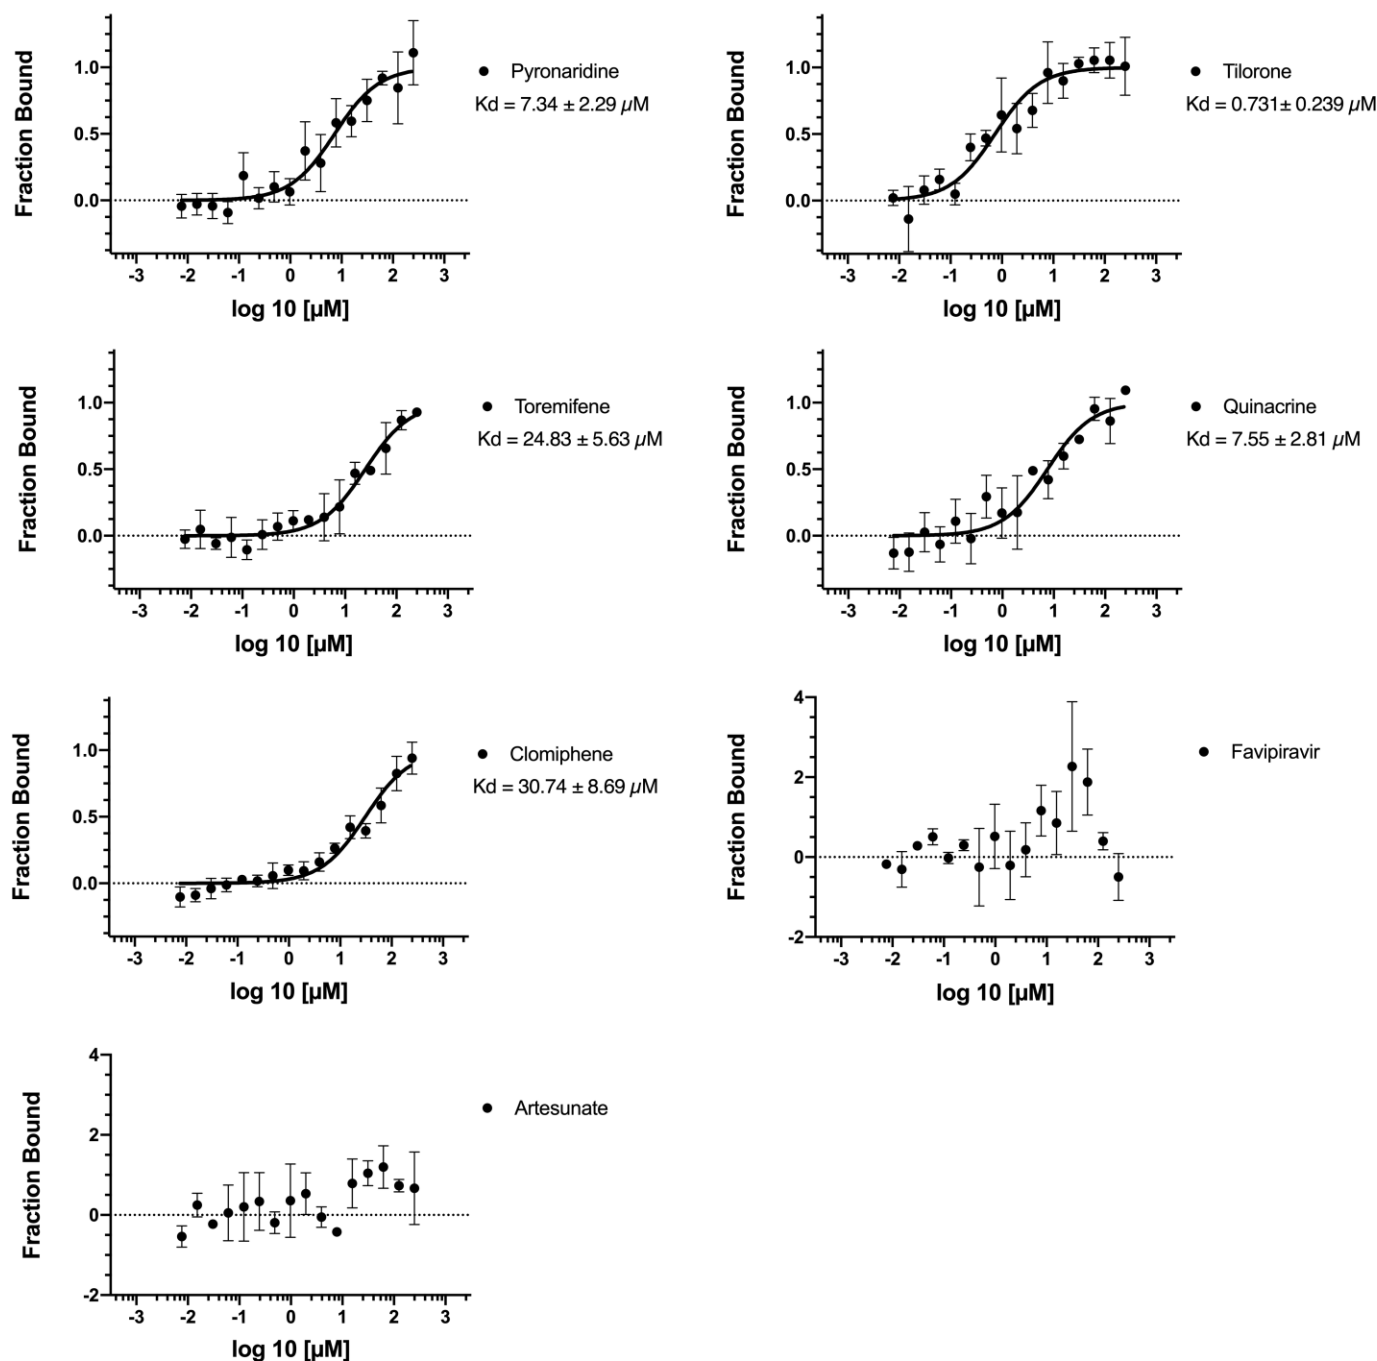



321  
322  
323  
324
